# Supplementary material for: Comparison of fast Fourier transform infrared spectroscopy biotyping with whole genome sequencing-based genotyping in common nosocomial pathogens
Source: PubMed Central journal article supplement (PMC9482911; doi:10.1007/s00216-022-04270-6), 2022-08-13
Supplement: 216_2022_4270_MOESM1_ESM.pdf [file 216_2022_4270_MOESM1_ESM.pdf]

**Supplement A.1.** All available characteristics of the 25 *Acinetobacter Baumannii* isolates included in either FTIRS, WGS or both analysis methods.

| Study number | Year of isolation | Material of isolation | Antibiogram   |             |          |           |             |
|--------------|-------------------|-----------------------|---------------|-------------|----------|-----------|-------------|
|              |                   |                       | Ciprofloxacin | Gentamicine | Imipenem | Meropenem | Tobramycine |
| ACE 01       | 2015              | NA                    | NA            | NA          | NA       | NA        | NA          |
| ACE 02       | 2015              | NA                    | NA            | NA          | NA       | NA        | NA          |
| ACE 03       | 2015              | NA                    | NA            | NA          | NA       | NA        | NA          |
| ACE 04       | 2015              | NA                    | NA            | NA          | NA       | NA        | NA          |
| ACE 05       | 2018              | Clinical              | R             | R           | R        | R         | R           |
| ACE 06       | 2018              | Clinical              | R             | R           | R        | R         | R           |
| ACE 07       | 2018              | Clinical              | R             | R           | R        | R         | R           |
| ACE 08       | 2018              | Clinical              | R             | R           | R        | R         | R           |
| ACE 09       | 2018              | Clinical              | R             | R           | R        | R         | R           |
| ACE 10       | 2018              | Environment           | S             | S           | S        | S         | S           |
| ACE 11       | 2018              | Environment           | S             | S           | S        | S         | S           |
| ACE 12       | 2018              | Environment           | S             | S           | S        | S         | S           |
| ACE 13       | 2018              | Environment           | S             | S           | S        | S         | S           |
| ACE 14       | 2018              | Clinical              | R             | R           | R        | R         | R           |
| ACE 15       | 2018              | Clinical              | R             | R           | R        | R         | R           |
| ACE 16       | 2018              | Clinical              | R             | R           | R        | R         | R           |
| ACE 17       | 2018              | Clinical              | R             | R           | R        | R         | R           |
| ACE 18       | 2018              | Clinical              | R             | R           | R        | R         | R           |
| ACE 19       | 2018              | Environment           | R             | R           | R        | R         | R           |
| ACE 20       | 2018              | Environment           | R             | R           | R        | R         | R           |
| ACE 21       | 2018              | Environment           | R             | R           | R        | R         | R           |
| ACE 22       | 2018              | Environment           | R             | R           | R        | R         | R           |
| ACE 23       | 2018              | Environment           | NA            | NA          | NA       | NA        | NA          |
| ACE 24       | 2018              | Environment           | NA            | NA          | NA       | NA        | NA          |
| ACE 27       | 2018              | Clinical              | R             | S           | R        | R         | S           |

R = Resistant S = Susceptible

I = Susceptible at increased exposure

NA = Not Available

**Supplement A.2.** All available characteristics of the 31 Escherichia coli isolates included in either FTIRS, WGS or both analysis methods.

| Study number | Year of isolation | Material of isolation | Antibiogram |             |            |           |               |             |          |           |             |    |
|--------------|-------------------|-----------------------|-------------|-------------|------------|-----------|---------------|-------------|----------|-----------|-------------|----|
|              |                   |                       | ESBL        | Ceftriaxone | Ceftazidim | Cefotaxim | Ciprofloxacin | Gentamicine | Imipenem | Meropenem | Tobramycine |    |
| ECO 01       | 2014              | Clinical              | -           | S           | S          | S         | S             | S           | S        | S         | S           | S  |
| ECO 02       | 2014              | Clinical              | -           | S           | S          | S         | S             | S           | S        | S         | S           | S  |
| ECO 03       | 2014              | Clinical              | -           | S           | S          | S         | S             | S           | S        | S         | S           | S  |
| ECO 04       | 2015              | Clinical              | +           | R           | R          | R         | S             | S           | S        | S         | S           | S  |
| ECO 05       | 2015              | Clinical              | +           | R           | R          | R         | S             | S           | NA       | S         | S           | S  |
| ECO 06       | 2015              | Clinical              | +           | R           | NA         | R         | R             | S           | NA       | S         | NA          | NA |
| ECO 07       | 2015              | Clinical              | +           | R           | NA         | R         | R             | S           | NA       | S         | NA          | NA |
| ECO 08       | 2015              | Clinical              | +           | R           | NA         | R         | R             | S           | NA       | S         | NA          | NA |
| ECO 09       | 2015              | Clinical              | +           | R           | NA         | R         | R             | S           | NA       | S         | NA          | NA |
| ECO 10       | 2015              | Clinical              | +           | NA          | NA         | NA        | NA            | NA          | NA       | NA        | NA          | NA |
| ECO 11       | 2015              | NA                    | +           | NA          | NA         | NA        | NA            | NA          | NA       | NA        | NA          | NA |
| ECO 12       | 2015              | Clinical              | +           | R           | NA         | R         | R             | S           | NA       | S         | NA          | NA |
| ECO 13       | 2016              | Clinical              | -           | S           | NA         | S         | R             | R           | NA       | NA        | R           | R  |
| ECO 14       | 2016              | Clinical              | -           | S           | NA         | S         | R             | R           | NA       | NA        | R           | R  |
| ECO 15       | 2016              | Clinical              | -           | S           | NA         | S         | S             | S           | NA       | NA        | NA          | NA |
| ECO 16       | 2016              | Clinical              | -           | S           | NA         | S         | S             | S           | NA       | NA        | NA          | NA |
| ECO 17       | 2017              | Clinical              | -           | S           | S          | S         | R             | R           | S        | S         | R           | R  |
| ECO 18       | 2017              | Clinical              | -           | R           | R          | R         | R             | R           | S        | S         | R           | R  |
| ECO 19       | 2017              | Clinical              |             | R           | R          | R         | R             | S           | S        | S         | S           | S  |
| ECO 20       | 2017              | Clinical              | +           | R           | R          | R         | R             | R           | S        | S         | R           | R  |
| ECO 21       | 2017              | Clinical              | +           | R           | R          | R         | R             | R           | S        | S         | R           | R  |
| ECO 22       | 2018              | Clinical              | +           | R           | R          | R         | R             | R           | S        | S         | R           | R  |
| ECO 23       | 2019              | Clinical              | -           | R           | R          | R         | R             | R           | R        | I         | R           | R  |
| ECO 24       | 2019              | Clinical              | -           | R           | R          | R         | S             | S           | R        | R         | S           | S  |
| ECO 25       | 2019              | Clinical              | -           | R           | R          | R         | R             | S           | R        | R         | S           | S  |

|        |      |          |   |   |   |   |   |   |   |   |   |
|--------|------|----------|---|---|---|---|---|---|---|---|---|
| ECO 26 | 2019 | Clinical | - | R | R | R | S | S | I | I | S |
| ECO 27 | 2019 | Clinical | - | R | R | R | S | S | I | I | S |
| ECO 28 | 2019 | Clinical | - | R | R | R | S | S | R | I | S |
| ECO 29 | 2018 | Clinical | - | R | R | R | R | S | R | R | S |
| ECO 30 | 2018 | Clinical | - | R | R | R | R | R | R | I | R |
| ECO 31 | 2018 | Clinical | - | R | R | R | R | R | R | R | R |

R = Resistant      S = Susceptible      I = Susceptible at increased exposure      NA = Not Available      + = Extended-Spectrum Beta-Lactamases (ESBL) positive      - = ESBL negative

**Supplement A.3.** All available characteristics of the 22 *Enterococcus faecium* isolates included in either FTIRS, WGS or both analysis methods.

| Study number | Year of isolation | Material of isolation | Antibiogram |
|--------------|-------------------|-----------------------|-------------|
| VRE 02       | 2017              | Clinical              | VRE         |
| VRE 05       | 2017              | Clinical              | VRE         |
| VRE 13       | 2017              | Clinical              | VRE         |
| VRE 14       | 2017              | Clinical              | VRE         |
| VRE 15       | 2017              | Clinical              | VRE         |
| VRE 16       | 2017              | Clinical              | VRE         |
| VRE 17       | 2017              | Clinical              | VRE         |
| VRE 18       | 2017              | Clinical              | VRE         |
| VRE 19       | 2017              | Clinical              | VRE         |
| VRE 20       | 2017              | Clinical              | VRE         |
| VRE 21       | 2017              | Clinical              | VRE         |
| VRE 28       | 2017              | Clinical              | VRE         |
| VRE 30       | 2019              | NA                    | VRE         |
| VRE 31       | 2020              | NA                    | VRE         |
| VRE 32       | 2019              | NA                    | VRE         |
| VRE 33       | 2019              | NA                    | VRE         |
| VRE 34       | 2019              | NA                    | VRE         |
| VRE 35       | 2019              | NA                    | VRE         |

|        |      |    |     |
|--------|------|----|-----|
| VRE 36 | 2019 | NA | VRE |
| VRE 37 | 2019 | NA | VRE |
| VRE 38 | 2019 | NA | VRE |
| VRE 39 | 2019 | NA | VRE |

VRE = Vancomycin resistant *Enterococcus faecium*

**Supplement A.4.** All available characteristics of the 37 *Staphylococcus aureus* isolates included in either FTIRS, WGS or both analysis methods.

| Study number | Year of isolation | Material of isolation | Antibiogram |
|--------------|-------------------|-----------------------|-------------|
| SAU 01       | 2015              | Clinical              | MRSA        |
| SAU 02       | 2015              | Clinical              | MSSA        |
| SAU 03       | 2015              | Clinical              | MRSA        |
| SAU 04       | 2015              | Clinical              | MSSA        |
| SAU 05       | 2015              | Clinical              | MRSA        |
| SAU 06       | 2015              | Clinical              | MRSA        |
| SAU 07       | 2016              | Clinical              | MRSA        |
| SAU 08       | 2016              | Clinical              | MRSA        |
| SAU 10       | 2017              | Clinical              | MRSA        |
| SAU 11       | 2017              | Clinical              | MRSA        |
| SAU 12       | 2017              | Clinical              | MRSA        |
| SAU 13       | 2018              | Clinical              | MSSA        |
| SAU 14       | 2018              | Clinical              | MSSA        |
| SAU 15       | 2018              | Clinical              | MSSA        |
| SAU 16       | 2018              | Clinical              | MRSA        |
| SAU 17       | 2018              | Clinical              | MRSA        |
| SAU 18       | 2018              | Clinical              | MRSA        |
| SAU 19       | 2018              | Clinical              | MRSA        |
| SAU 20       | 2018              | Clinical              | MRSA        |
| SAU 21       | 2018              | Clinical              | MSSA        |
| SAU 22       | 2018              | Clinical              | MRSA        |

|        |      |          |      |
|--------|------|----------|------|
| SAU 23 | 2018 | Clinical | MRSA |
| SAU 24 | 2018 | Clinical | MRSA |
| SAU 25 | 2018 | Clinical | MRSA |
| SAU 26 | 2019 | Clinical | MRSA |
| SAU 27 | 2019 | Clinical | MSSA |
| SAU 28 | 2019 | Clinical | MSSA |
| SAU 29 | 2019 | Clinical | MSSA |
| SAU 30 | 2019 | Clinical | MRSA |
| SAU 31 | 2019 | Clinical | MRSA |
| SAU 32 | 2019 | Clinical | MRSA |
| SAU 33 | 2019 | Clinical | MSSA |
| SAU 34 | 2019 | Clinical | MSSA |
| SAU 35 | 2019 | NA       | MSSA |
| SAU 36 | 2019 | NA       | MSSA |
| SAU 37 | 2019 | Clinical | MRSA |
| SAU 38 | 2019 | Clinical | MRSA |

MSSA = Methicillin-susceptible *Staphylococcus aureus*

MRSA = Methicillin-resistant *Staphylococcus aureus*

**Supplement A.5.** All available characteristics of the 30 *Pseudomonas aeruginosa* isolates included in either FTIRS, WGS or both analysis methods.

| Study number | Year of isolation | Material of isolation | Antibiogram |               |          |           |             |               |
|--------------|-------------------|-----------------------|-------------|---------------|----------|-----------|-------------|---------------|
|              |                   |                       | Ceftazidim  | Ciprofloxacin | Imipenem | Meropenem | Tobramycine | Piperacilline |
| PSA 01       | NA                | NA                    | NA          | NA            | NA       | NA        | NA          | NA            |
| PSA 02       | 2011              | NA                    | NA          | NA            | NA       | NA        | NA          | NA            |
| PSA 03       | 2011              | NA                    | NA          | NA            | NA       | NA        | NA          | NA            |
| PSA 04       | 2011              | NA                    | NA          | NA            | NA       | NA        | NA          | NA            |
| PSA 05       | 2011              | NA                    | NA          | NA            | NA       | NA        | NA          | NA            |
| PSA 06       | 2011              | NA                    | NA          | NA            | NA       | NA        | NA          | NA            |
| PSA 07       | 2011              | NA                    | NA          | NA            | NA       | NA        | NA          | NA            |

|        |      |             |    |    |    |    |    |    |
|--------|------|-------------|----|----|----|----|----|----|
| PSA 08 | 2011 | NA          | NA | NA | NA | NA | NA | NA |
| PSA 09 | 2014 | NA          | NA | NA | NA | NA | NA | NA |
| PSA 10 | 2014 | NA          | NA | NA | NA | NA | NA | NA |
| PSA 11 | 2014 | NA          | NA | NA | NA | NA | NA | NA |
| PSA 12 | 2014 | NA          | NA | NA | NA | NA | NA | NA |
| PSA 13 | 2014 | Environment | R  | R  | R  | R  | R  | NA |
| PSA 14 | 2014 | Clinical    | R  | R  | R  | R  | R  | R  |
| PSA 15 | 2015 | Environment | NA | NA | NA | NA | NA | NA |
| PSA 16 | 2016 | Clinical    | R  | R  | R  | R  | R  | NA |
| PSA 17 | 2016 | Clinical    | I  | R  | R  | R  | R  | NA |
| PSA 18 | 2016 | Clinical    | R  | R  | R  | R  | R  | R  |
| PSA 19 | 2016 | Environment | NA | NA | NA | NA | NA | NA |
| PSA 20 | 2016 | Environment | NA | NA | NA | NA | NA | NA |
| PSA 21 | 2017 | Clinical    | R  | R  | R  | R  | R  | NA |
| PSA 22 | 2017 | Clinical    | R  | R  | R  | R  | R  | NA |
| PSA 23 | 2018 | Environment | NA | NA | NA | NA | NA | NA |
| PSA 24 | 2018 | Environment | NA | NA | NA | NA | NA | NA |
| PSA 25 | 2018 | Environment | NA | NA | NA | NA | NA | NA |
| PSA 26 | 2018 | Clinical    | R  | R  | I  | R  | S  | NA |
| PSA 27 | 2019 | Clinical    | S  | S  | S  | S  | S  | NA |
| PSA 28 | 2019 | Clinical    | S  | S  | S  | S  | S  | NA |
| PSA 29 | 2019 | Clinical    | S  | S  | S  | S  | S  | NA |
| PSA 30 | 2019 | Clinical    | R  | R  | I  | I  | S  | NA |

R = Resistant    S = Susceptible    I = Susceptible at increased exposure    NA = Not Available

**FTIRS cluster of 22 *E. faecium* isolates**

| Isolate ID | Reprun 1   | Reprun 2     | Reprun 3     |
|------------|------------|--------------|--------------|
| VRE 02     | Cluster 01 | Cluster 01   | Removed      |
| VRE 05     | Cluster 01 | Cluster 01   | Cluster 01   |
| VRE 13     | Cluster 01 | Cluster 01   | Cluster 01   |
| VRE 14     | Cluster 01 | Cluster 01   | Cluster 01   |
| VRE 15     | Cluster 01 | Cluster 07 ← | Cluster 03 ← |
| VRE 16     | Cluster 01 | Cluster 01   | Cluster 01   |
| VRE 17     | Cluster 01 | Cluster 01   | Cluster 01   |
| VRE 18     | Cluster 01 | Cluster 01   | Cluster 01   |
| VRE 19     | Cluster 01 | Removed      | Cluster 01   |
| VRE 20     | Cluster 01 | Cluster 01   | Cluster 01   |
| VRE 21     | Cluster 01 | Cluster 01   | Cluster 03 ← |
| VRE 28     | Cluster 01 | Cluster 01   | Cluster 01   |
| VRE 38     | Cluster 01 | Cluster 01   | Cluster 01   |
| VRE 30     | Cluster 02 | Cluster 02   | Cluster 02   |
| VRE 31     | Cluster 02 | Cluster 02   | Cluster 02   |
| VRE 32     | Cluster 02 | Cluster 02   | Cluster 02   |
| VRE 33     | Cluster 02 | Cluster 02   | Cluster 02   |
| VRE 34     | Cluster 02 | Cluster 02   | Cluster 02   |
| VRE 35     | Cluster 02 | Cluster 02   | Cluster 02   |
| VRE 36     | Cluster 04 | Cluster 04   | Cluster 04   |
| VRE 37     | Cluster 05 | Cluster 05   | Cluster 05   |
| VRE 39     | Cluster 06 | Cluster 06   | Cluster 06   |

**FTIRS cluster of 25 *A. baumannii* isolates**

| Isolate ID | Reprun 1   | Reprun 2     | Reprun 3     |
|------------|------------|--------------|--------------|
| ACE 6      | Cluster 01 | Cluster 01   | Cluster 01   |
| ACE 14     | Cluster 01 | Cluster 01   | Cluster 01   |
| ACE 15     | Cluster 01 | Cluster 01   | Cluster 01   |
| ACE 16     | Cluster 01 | Cluster 02 ← | Cluster 01   |
| ACE 17     | Cluster 01 | Cluster 01   | Cluster 01   |
| ACE 18     | Cluster 01 | Cluster 01   | Cluster 01   |
| ACE 19     | Cluster 01 | Cluster 01   | Cluster 01   |
| ACE 20     | Cluster 01 | Cluster 01   | Cluster 01   |
| ACE 21     | Cluster 01 | Cluster 01   | Cluster 01   |
| ACE 22     | Cluster 01 | Cluster 01   | Cluster 01   |
| ACE 23     | Cluster 01 | Cluster 01   | Cluster 01   |
| ACE 24     | Cluster 01 | Cluster 01   | Cluster 01   |
| ACE 5      | Cluster 02 | Cluster 02   | Cluster 02   |
| ACE 7      | Cluster 02 | Cluster 02   | Cluster 02   |
| ACE 8      | Cluster 02 | Cluster 02   | Cluster 01 ← |
| ACE 9      | Cluster 02 | Removed      | Cluster 02   |
| ACE 10     | Cluster 03 | Cluster 03   | Cluster 03   |
| ACE 12     | Cluster 03 | Cluster 03   | Cluster 03   |
| ACE 13     | Cluster 03 | Removed      | Cluster 03   |
| ACE 11     | Removed    | Cluster 03   | Cluster 03   |
| ACE 1      | Cluster 04 | Cluster 04   | Cluster 04   |
| ACE 4      | Cluster 04 | Cluster 04   | Cluster 04   |
| ACE 2      | Cluster 05 | Cluster 05   | Cluster 07 ← |
| ACE 3      | Cluster 05 | Cluster 05   | Removed      |
| ACE 27     | Cluster 06 | Cluster 06   | Cluster 06   |

**FTIRS cluster of 31 *E. coli* isolates**

| Isolate ID | Reprun 1   | Reprun 2   | Reprun 3     |
|------------|------------|------------|--------------|
| ECO1       | Cluster 01 | Cluster 01 | Cluster 01   |
| ECO2       | Cluster 01 | Cluster 01 | Cluster 01   |
| ECO3       | Cluster 01 | Cluster 01 | Cluster 01   |
| ECO4       | Cluster 02 | Cluster 02 | Cluster 02   |
| ECO5       | Cluster 02 | Cluster 02 | Cluster 02   |
| ECO6       | Cluster 03 | Cluster 03 | Cluster 03   |
| ECO8       | Cluster 03 | Cluster 03 | Cluster 03   |
| ECO10      | Cluster 03 | Cluster 03 | Cluster 03   |
| ECO12      | Cluster 03 | Cluster 03 | Cluster 03   |
| ECO20      | Cluster 03 | Cluster 03 | Cluster 03   |
| ECO11      | Cluster 04 | Cluster 04 | Cluster 04   |
| ECO16      | Cluster 04 | Cluster 04 | Cluster 04   |
| ECO26      | Cluster 05 | Cluster 05 | Cluster 05   |
| ECO27      | Cluster 05 | Cluster 05 | Cluster 05   |
| ECO28      | Cluster 05 | Cluster 05 | Cluster 05   |
| ECO17      | Cluster 06 | Cluster 06 | Cluster 06   |
| ECO24      | Cluster 06 | Cluster 06 | Cluster 06   |
| ECO18      | Removed    | Removed    | Cluster 06   |
| ECO7       | Cluster 07 | Cluster 07 | Cluster 03 ← |
| ECO9       | Cluster 07 | Cluster 07 | Cluster 03 ← |
| ECO25      | Cluster 08 | Cluster 08 | Cluster 08   |
| ECO30      | Cluster 08 | Cluster 08 | Cluster 08   |
| ECO13      | Cluster 09 | Cluster 09 | Cluster 09   |
| ECO14      | Cluster 10 | Cluster 10 | Cluster 10   |
| ECO15      | Cluster 11 | Cluster 11 | Cluster 11   |
| ECO19      | Cluster 12 | Cluster 12 | Cluster 12   |
| ECO21      | Cluster 13 | Cluster 13 | Cluster 13   |
| ECO22      | Cluster 14 | Cluster 14 | Cluster 14   |
| ECO23      | Cluster 15 | Cluster 15 | Cluster 15   |
| ECO29      | Cluster 16 | Cluster 16 | Cluster 16   |
| ECO31      | Cluster 17 | Cluster 17 | Cluster 17   |

**FTIRS cluster of 37 *S. aureus* isolates**

| Isolate ID | Reprun 1   | Reprun 2     | Reprun 3     |
|------------|------------|--------------|--------------|
| SAU 02     | Cluster 01 | Cluster 01   | Cluster 01   |
| SAU 03     | Cluster 01 | Cluster 01   | Cluster 19 ← |
| SAU 04     | Cluster 01 | Cluster 01   | Cluster 01   |
| SAU 14     | Cluster 01 | Cluster 01   | Cluster 01   |
| SAU 15     | Cluster 01 | Cluster 01   | Cluster 01   |
| SAU 28     | Cluster 01 | Cluster 01   | Cluster 03 ← |
| SAU 29     | Cluster 01 | Cluster 01   | Cluster 01   |
| SAU 30     | Cluster 01 | Cluster 01   | Cluster 01   |
| SAU 34     | Cluster 01 | Cluster 01   | Cluster 01   |
| SAU 35     | Cluster 01 | Cluster 01   | Cluster 01   |
| SAU 36     | Cluster 01 | Cluster 01   | Cluster 01   |
| SAU 06     | Cluster 02 | Cluster 02   | Cluster 02   |
| SAU 07     | Cluster 02 | Cluster 16 ← | Cluster 02   |
| SAU 08     | Cluster 02 | Cluster 06 ← | Cluster 02   |
| SAU 09     | Cluster 02 | Cluster 06 ← | Cluster 02   |
| SAU 10     | Cluster 02 | Cluster 02   | Cluster 02   |
| SAU 11     | Cluster 02 | Cluster 02   | Cluster 02   |
| SAU 12     | Cluster 02 | Cluster 02   | Cluster 02   |
| SAU 16     | Cluster 02 | Cluster 02   | Cluster 02   |
| SAU 17     | Cluster 02 | Cluster 02   | Cluster 02   |
| SAU 26     | Cluster 02 | Cluster 02   | Cluster 02   |
| SAU 27     | Cluster 02 | Cluster 02   | Cluster 20 ← |
| SAU 38     | Cluster 02 | Cluster 17 ← | Cluster 02   |
| SAU 23     | Cluster 03 | Cluster 18 ← | Cluster 03   |
| SAU 24     | Cluster 03 | Removed      | Cluster 03   |
| SAU 18     | Cluster 05 | Cluster 01 ← | Cluster 21 ← |
| SAU 19     | Cluster 05 | Cluster 01 ← | Cluster 01 ← |
| SAU 01     | Cluster 06 | Cluster 06   | Cluster 06   |
| SAU 05     | Cluster 07 | Cluster 03 ← | Cluster 03 ← |
| SAU 13     | Cluster 08 | Cluster 08   | Cluster 08   |
| SAU 20     | Cluster 09 | Cluster 09   | Cluster 01 ← |
| SAU 21     | Cluster 10 | Cluster 10   | Cluster 10   |
| SAU 22     | Cluster 11 | Cluster 04 ← | Cluster 11   |
| SAU 25     | Cluster 12 | Cluster 01 ← | Cluster 12   |
| SAU 31     | Cluster 13 | Cluster 04 ← | Cluster 01 ← |
| SAU 32     | Cluster 14 | Cluster 03 ← | Cluster 03 ← |
| SAU 33     | Cluster 15 | Cluster 01 ← | Cluster 01 ← |

**FTIRS cluster of 30 *P. aeruginosa* isolates**

| Isolate ID | Reprun 1   | Reprun 2     | Reprun 3     |
|------------|------------|--------------|--------------|
| PSA 01     | Cluster 03 | Cluster 03   | Cluster 02 ← |
| PSA 02     | Cluster 04 | Cluster 02 ← | Cluster 01 ← |
| PSA 03     | Cluster 05 | Cluster 05   | Cluster 05   |
| PSA 04     | Cluster 06 | Removed      | Cluster 06   |
| PSA 05     | Cluster 07 | Cluster 07   | Cluster 07   |
| PSA 06     | Cluster 08 | Cluster 08   | Cluster 08   |
| PSA 07     | Cluster 09 | Cluster 09   | Cluster 02 ← |
| PSA 08     | Cluster 10 | Removed      | Cluster 02 ← |
| PSA 09     | Cluster 11 | Cluster 11   | Cluster 11   |
| PSA 10     | Removed    | Cluster 12   | Cluster 12   |
| PSA 11     | Cluster 13 | Cluster 13   | Removed      |
| PSA 12     | Cluster 14 | Cluster 14   | Cluster 14   |
| PSA 13     | Removed    | Removed      | Removed      |
| PSA 14     | Removed    | Cluster 01   | Removed      |
| PSA 15     | Removed    | Cluster 01   | Cluster 01   |
| PSA 16     | Removed    | Removed      | Cluster 01   |
| PSA 17     | Removed    | Removed      | Removed      |
| PSA 18     | Removed    | Removed      | Cluster 01   |
| PSA 19     | Cluster 15 | Removed      | Removed      |
| PSA 20     | Cluster 16 | Cluster 16   | Removed      |
| PSA 21     | Removed    | Removed      | Removed      |
| PSA 22     | Removed    | Removed      | Removed      |
| PSA 23     | Cluster 17 | Cluster 17   | Removed      |
| PSA 24     | Cluster 18 | Cluster 18   | Cluster 18   |
| PSA 25     | Cluster 19 | Cluster 19   | Cluster 19   |
| PSA 26     | Cluster 20 | Cluster 20   | Cluster 20   |
| PSA 27     | Removed    | Cluster 23   | Removed      |
| PSA 28     | Cluster 21 | Cluster 21   | Cluster 21   |
| PSA 29     | Removed    | Cluster 24   | Cluster 24   |
| PSA 30     | Cluster 22 | Cluster 22   | Removed      |

**Supplement B.** FTIRS cluster analysis of three replicate runs of *A. baumannii*, *E. coli*, *E. faecium*, *S. aureus* and *P. aeruginosa* isolates. The FTIRS clusters of reprun 1 are displayed as shaded boxes. The arrows indicate incongruently clustered isolates between rep run 1 compared to rep run 2 or 3.

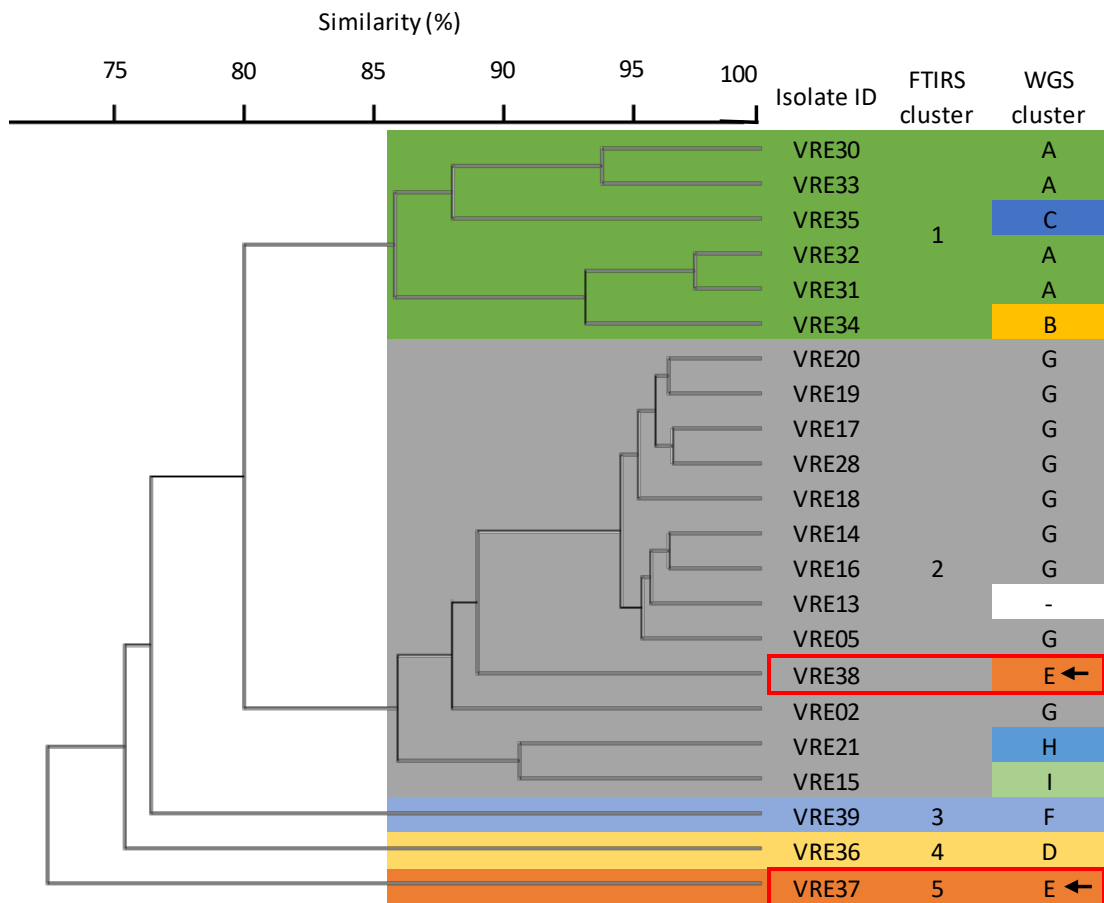

**Supplement C.1.** Clustering of FTIRS of 22 *E. faecium* isolates and the corresponding WGS and AFLP cluster of the isolate<sup>a</sup>. FTIRS clusters are displayed as shaded boxes. Incongruently clustered isolates are marked with arrows.

<sup>a</sup>Due to the size of the figure, the mean of the 12 replicates per isolate was used to display the tree instead of the raw data per isolate.



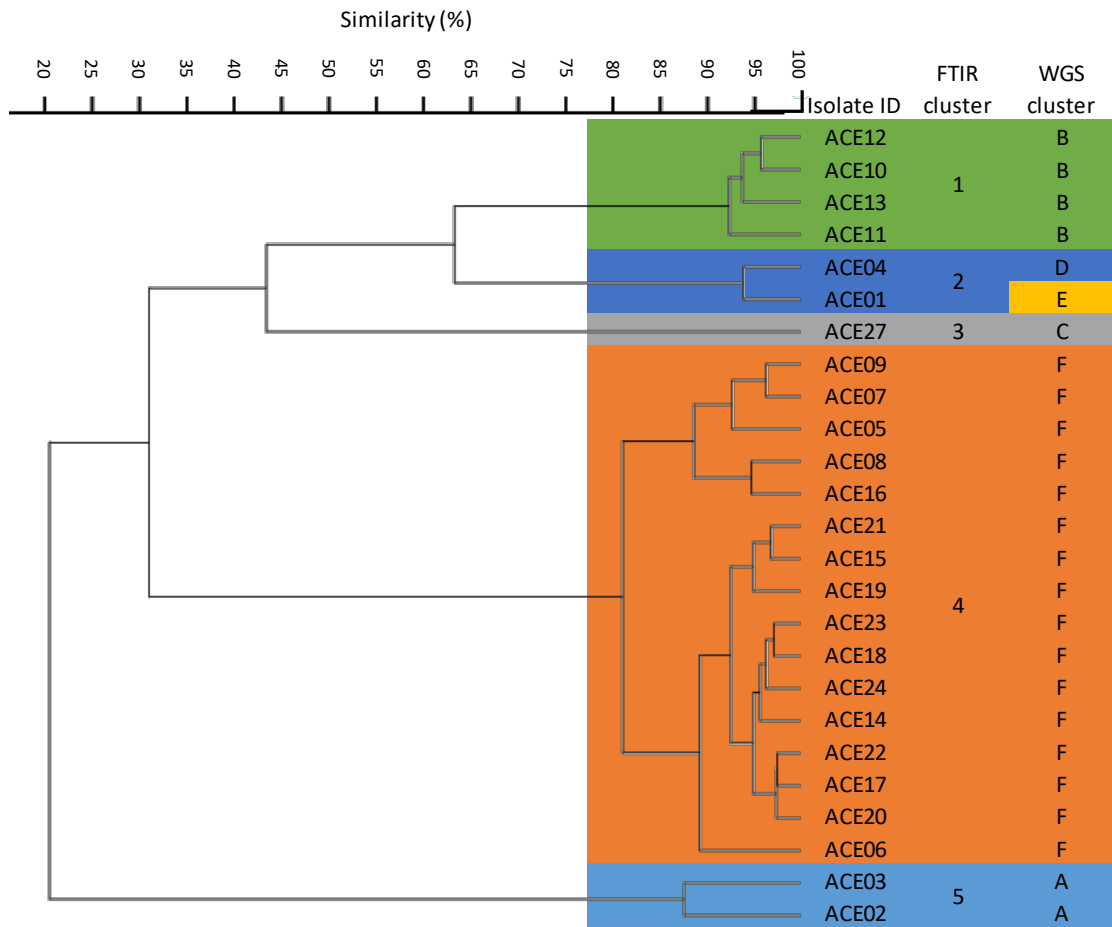

**Supplement C.2.** Clustering of FTIRS of 25 *A. baumannii* isolates and the corresponding WGS and AFLP cluster of the isolate<sup>a</sup>. FTIRS clusters are displayed as shaded boxes.

<sup>a</sup>Due to the size of the figure, the mean of the 12 replicates per isolate was used to display the tree instead of the raw data per isolate.

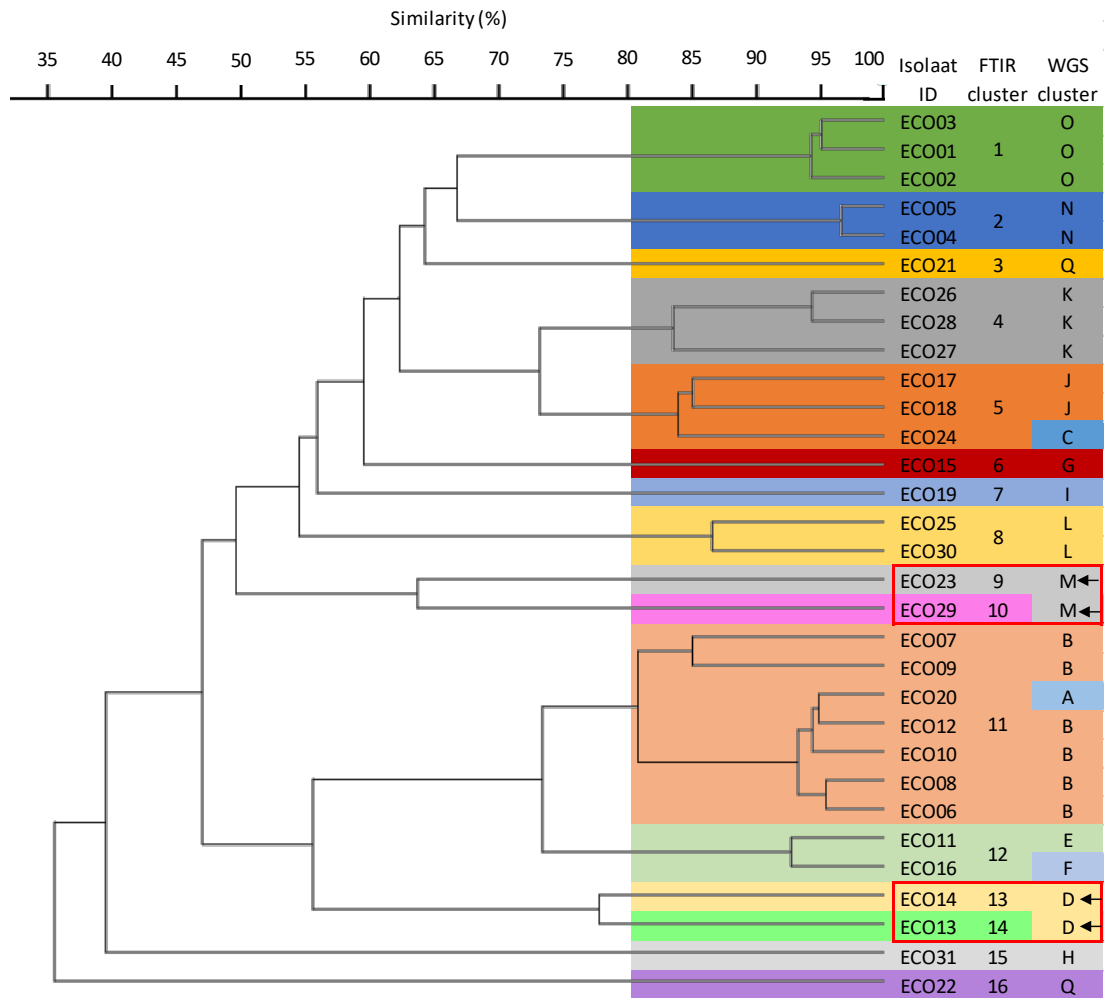

**Supplement C.3.** Clustering of FTIRS of 31 *E. coli* isolates and the corresponding WGS and AFLP cluster of the isolate<sup>a</sup>. FTIRS clusters are displayed as shaded boxes. Incongruently clustered isolates are marked with arrows.

<sup>a</sup>Due to the size of the figure, the mean of the 12 replicates per isolate was used to display the tree instead of the raw data per isolate.
